# Supplementary material for: Indirect and time-lapse X-ray detection with Ba2LuNbO6:Bi3+ double perovskite phosphors
Source: Royal Society of Chemistry journal article supplement (doi:10.1039/d2tc00585a), 2022-01-01
Supplement: d2tc00585a1.pdf [file d2tc00585a1.pdf]

## Supplementary Information

### **Indirect and Time-lapse X-ray Detection with $\text{Ba}_2\text{LuNbO}_6$ : $\text{Bi}^{3+}$**

#### **Double Perovskite Phosphors**

Zhenzhen Cui <sup>a, b</sup>, Ting Wang <sup>c,\*</sup>, Longchao Guo <sup>a</sup>, Feng Zhao <sup>a,\*</sup>, Jianbei Qiu <sup>b</sup>, Xuhui Xu <sup>b</sup>, and Xue Yu <sup>a,\*</sup>

<sup>a</sup> School of Mechanical Engineering, Institute of Advanced Materials, Chengdu University, Chengdu 610000, China.

<sup>b</sup> College of Materials Science and Engineering, Kunming University of Science and Technology, Kunming 650093, China.

<sup>c</sup> College of Materials and Chemistry & Chemical Engineering, Chengdu University of Technology, Chengdu 610059, China.

**Table S1.** The parameters of the TL curves of  $\text{Ba}_2\text{LuNbO}_6: 0.03 \text{Bi}^{3+}$ .

| Trap  | $T_1(\text{K})$ | $T_m(\text{K})$ | $T_2(\text{K})$ | $\tau$ | $\delta$ | $\omega$ | $\mu_g$ | $E(\text{eV})$ |
|-------|-----------------|-----------------|-----------------|--------|----------|----------|---------|----------------|
| $T_A$ | 319             | 337             | 355             | c      | 18       | 36       | 0.50    | 0.849          |
| $T_B$ | 359             | 379             | 397             | 20     | 19       | 39       | 0.49    | 0.961          |
| $T_C$ | 435             | 458             | 477             | 23     | 19       | 42       | 0.45    | 1.138          |

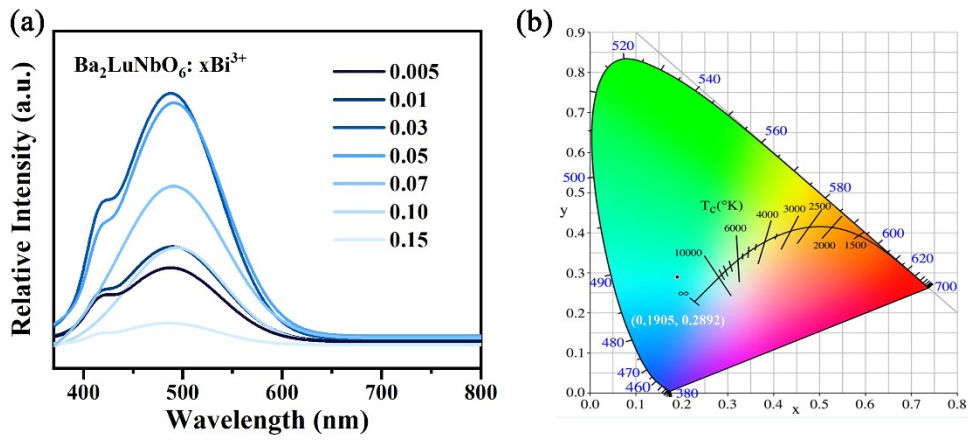

**Fig. S1** (a) PL spectra of  $\text{Ba}_2\text{LuNbO}_6: x \text{Bi}^{3+}$  ( $x = 0.005, 0.01, 0.03, 0.05, 0.07, 0.10,$  and  $0.15$ ); (b) the corresponding chromaticity coordinates of  $\text{Ba}_2\text{LuNbO}_6: 0.03 \text{Bi}^{3+}$  under  $333\text{nm}$  excitation.

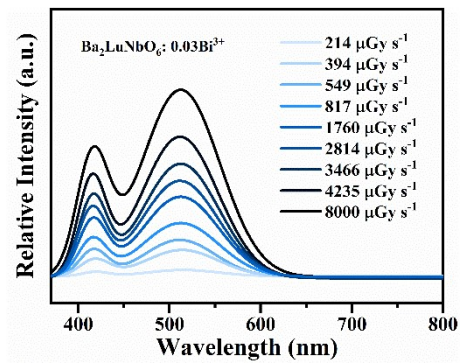

**Fig. S2** (a) Dose dependent RL intensity of  $\text{Ba}_2\text{LuNbO}_6: 0.03 \text{Bi}^{3+}$ .

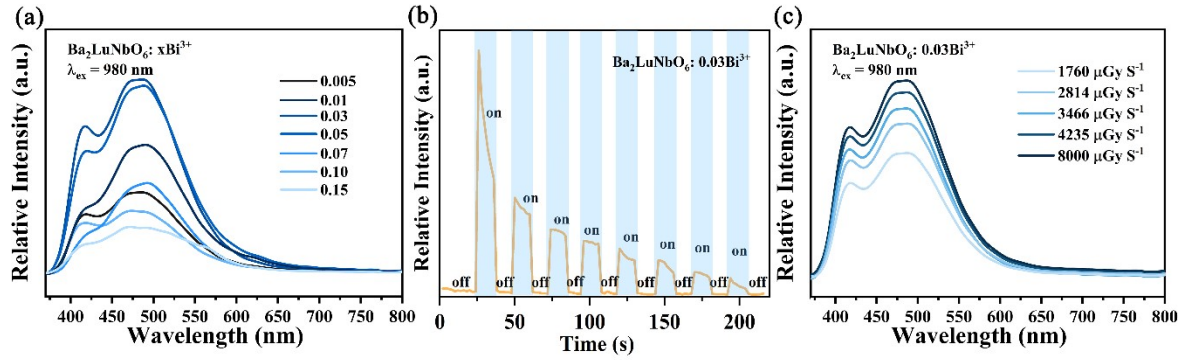

**Fig. S3** (a) PSL intensity as a function of  $\text{Ba}_2\text{LuNbO}_6: x\text{Bi}^{3+}$  ( $x = 0.005, 0.01, 0.03, 0.05, 0.07, 0.10,$  and  $0.15$ ) after X-ray pre-irradiated 900 s; (b) PSL intensity with time prolonging under the excitation of a 980 nm laser diode; (c) PSL spectra of  $\text{Ba}_2\text{LuNbO}_6: 0.03\text{Bi}^{3+}$  with different X-ray dose rate.

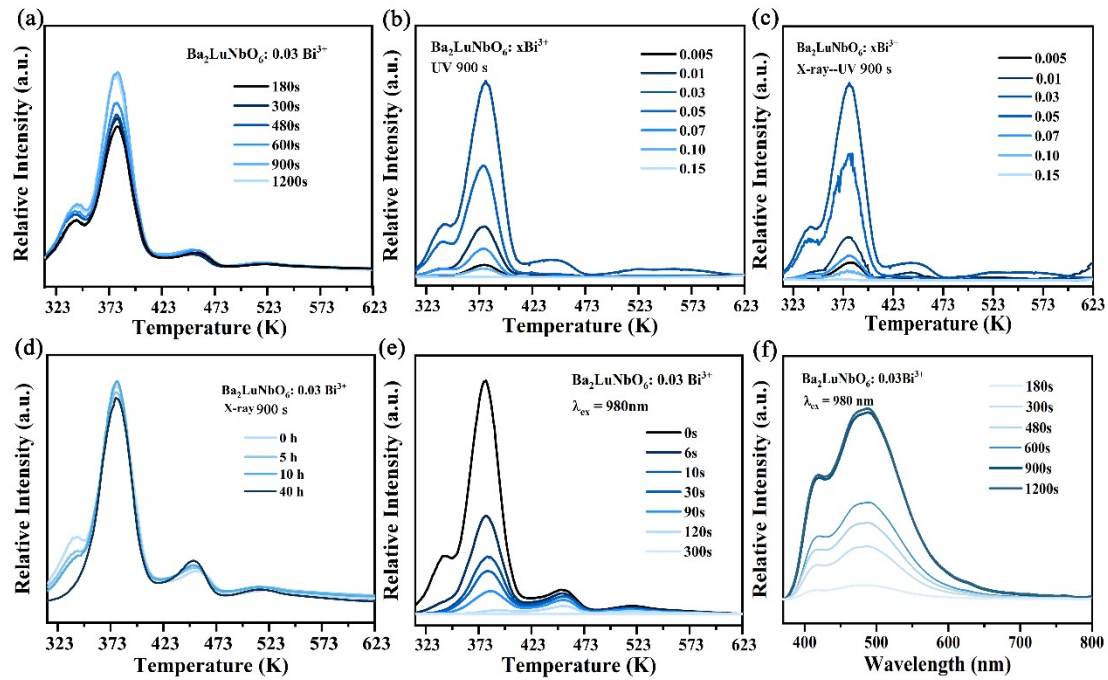

**Fig. S4** (a) TL curves of  $\text{Ba}_2\text{LuNbO}_6: 0.03\text{Bi}^{3+}$  under X-ray irradiation with different time; (b) TL curves of  $\text{Ba}_2\text{LuNbO}_6: x\text{Bi}^{3+}$  ( $x = 0.005, 0.01, 0.03, 0.05, 0.07, 0.10,$  and  $0.15$ ) recorded immediately after UV light pre-irradiated 900 s; (c) TL curves of  $\text{Ba}_2\text{LuNbO}_6: x\text{Bi}^{3+}$  ( $x = 0.005, 0.01, 0.03, 0.05, 0.07, 0.10,$  and  $0.15$ ) recorded immediately after X-ray pre-irradiated 900 s with UV light tested; (d) the corresponding time-dependent TL curves of  $\text{Ba}_2\text{LuNbO}_6: 0.03\text{Bi}^{3+}$  with X-ray pre-irradiated 900 s; (e) TL curves of  $\text{Ba}_2\text{LuNbO}_6: 0.03\text{Bi}^{3+}$  with X-ray pre-irradiated 900 s with the excitation of 980 nm; (f) PSL spectra of  $\text{Ba}_2\text{LuNbO}_6: 0.03\text{Bi}^{3+}$  recorded for prolonged time for X-ray irradiation.
